# Supplementary material
Source: PubMed Central journal article supplement (PMC8114795)
Supplement: NIHMS1694614-supplement-supplemental_tables.pdf [file NIHMS1694614-supplement-supplemental_tables.pdf]

**Supplemental table 1. 1-deoxydihydroceramide concentrations.**

| Deoxysphingolipids<br>(pmol/100 $\mu$ L) | Lean<br>controls   | Obese              | Obese/T2D            | Obese/T2D/DN         | Spearman<br>Correlation<br>(CC, p-value) |
|------------------------------------------|--------------------|--------------------|----------------------|----------------------|------------------------------------------|
| C16:0<br>1-deoxydihydroceramide          | 0.23 $\pm$<br>0.13 | 0.39 $\pm$<br>0.27 | 0.46 $\pm$ 0.29*     | 0.53 $\pm$ 0.29**    | 0.47<br><0.001                           |
| C18:0<br>1-deoxydihydroceramide          | 0.38 $\pm$<br>0.23 | 0.79 $\pm$<br>0.64 | 1.10 $\pm$<br>0.80** | 1.13 $\pm$ 0.58***   | 0.56<br><0.001                           |
| C20:0<br>1-deoxydihydroceramide          | 0.49 $\pm$<br>0.29 | 0.73 $\pm$<br>0.44 | 1.03 $\pm$<br>0.60** | 1.14 $\pm$ 0.43***,† | 0.52<br><0.001                           |
| C22:0<br>1-deoxydihydroceramide          | 1.58 $\pm$<br>1.10 | 1.66 $\pm$<br>0.97 | 2.04 $\pm$ 1.37      | 2.46 $\pm$ 0.88*     | 0.35<br>0.002                            |
| C24:0<br>1-deoxydihydroceramide          | 1.58 $\pm$<br>0.94 | 1.36 $\pm$<br>0.86 | 1.66 $\pm$ 0.99      | 1.88 $\pm$ 0.85      | 0.17<br>0.15                             |
| C24:1<br>1-deoxydihydroceramide          | 0.93 $\pm$<br>0.69 | 1.16 $\pm$<br>0.69 | 1.49 $\pm$ 1.01      | 1.81 $\pm$ 0.85**    | 0.43<br>0.0001                           |
| Total<br>1-deoxydihydroceramides         | 5.19 $\pm$<br>3.18 | 6.08 $\pm$<br>3.40 | 7.79 $\pm$ 4.54      | 8.94 $\pm$ 3.23**    | 0.41<br>0.0002                           |

\* statistically significant compared to lean (Tukey-Kramer adjusted p value: \*p<0.05, \*\*p<0.01, \*\*\*p<0.001).

† statistically significant compared to obese (Tukey-Kramer adjusted p value: †p<0.05, ††p<0.01, †††p<0.001).

**Supplemental table 2. Correlation of amino acids with individual 1-deoxydihydroceramide species**

|                                                                          | Serine ( $\mu\text{M}$ ) | Alanine ( $\mu\text{M}$ ) | Alanine:Serine Ratio |
|--------------------------------------------------------------------------|--------------------------|---------------------------|----------------------|
| <b>Deoxysphingolipids<br/>(<math>\text{pmol}/100 \mu\text{L}</math>)</b> |                          |                           |                      |
| C16:0 1-deoxydihydroceramide                                             | -0.37, 0.001             | 0.49, <0.0001             | 0.63, <0.0001        |
| C18:0 1-deoxydihydroceramide                                             | -0.31, 0.007             | 0.41, 0.0003              | 0.49, <0.0001        |
| C20:0 1-deoxydihydroceramide                                             | -0.35, 0.002             | 0.47, <0.0001             | 0.56, <0.0001        |
| C22:0 1-deoxydihydroceramide                                             | -0.31, 0.006             | 0.44, <0.0001             | 0.54, <0.0001        |
| C24:0 1-deoxydihydroceramide                                             | -0.23, 0.045             | 0.35, 0.002               | 0.39, 0.0005         |
| C24:1 1-deoxydihydroceramide                                             | -0.26, 0.027             | 0.29, 0.011               | 0.40, 0.0006         |
| Total 1-deoxydihydroceramides                                            | -0.33, 0.004             | 0.45, <0.0001             | 0.54, <0.0001        |

Values are expressed as correlation coefficient (CC), p value, n=75.

**Supplemental table 3. Correlation of individual 1-deoxydihydroceramide species and amino acids with neuropathy outcome measures**

|                                                            | MNSI-Q<br>(n=75) | MNSI-E<br>(n=75) | Sural Amplitude<br>(n=73) | IENFD Leg<br>(n=74) | IENFD<br>Thigh<br>(n=75) |
|------------------------------------------------------------|------------------|------------------|---------------------------|---------------------|--------------------------|
| <b>Deoxysphingolipids<br/>(pmol/100 <math>\mu</math>L)</b> |                  |                  |                           |                     |                          |
| C16:0 1-<br>deoxydihydroceramide                           | 0.29, 0.012      | 0.14,<br>0.219   | -0.25, 0.032              | -0.40, 0.0005       | -0.23,<br>0.052          |
| C18:0 1-<br>deoxydihydroceramide                           | 0.30, 0.008      | 0.11,<br>0.369   | -0.27, 0.023              | -0.42, 0.0002       | -0.17,<br>0.149          |
| C20:0 1-<br>deoxydihydroceramide                           | 0.37, 0.001      | 0.27,<br>0.018   | -0.35, 0.003              | -0.47,<br><0.0001   | -0.30,<br>0.009          |
| C22:0 1-<br>deoxydihydroceramide                           | 0.24, 0.04       | 0.15,<br>0.205   | -0.25, 0.034              | -0.28, 0.015        | -0.15,<br>0.200          |
| C24:0 1-<br>deoxydihydroceramide                           | 0.11, 0.336      | 0.04,<br>0.743   | -0.10, 0.381              | -0.079, 0.505       | -0.10,<br>0.417          |
| C24:1 1-<br>deoxydihydroceramide                           | 0.26, 0.023      | 0.18,<br>0.122   | -0.30, 0.010              | -0.36, 0.002        | -0.26,<br>0.024          |
| Total 1-<br>deoxydihydroceramides                          | 0.28, 0.016      | 0.16,<br>0.176   | -0.28, 0.018              | -0.34, 0.003        | -0.21,<br>0.070          |

Values are expressed as correlation coefficient (CC), p value. MNSI-Q, Michigan Neuropathy Screening Instrument Questionnaire; MNSI-E, Michigan Neuropathy Screening Instrument Exam Score; IENFD, intraepidermal nerve fiber density.

**Supplemental table 4. Comparison of total 1-deoxysphingolipids after adjusting for lactosylceramide concentrations**

|                                                            | Lean (n=19)       | Ob (n=19)         | Ob/T2D (n=18)       | Ob/T2D/DN (n=19)         |
|------------------------------------------------------------|-------------------|-------------------|---------------------|--------------------------|
| <b>Deoxysphingolipids<br/>(pmol/100 <math>\mu</math>L)</b> |                   |                   |                     |                          |
| C16:0 1-deoxydihydroceramide                               | 0.214 $\pm$ 0.040 | 0.386 $\pm$ 0.061 | 0.467 $\pm$ 0.069*  | 0.537 $\pm$ 0.070**      |
| C18:0 1-deoxydihydroceramide                               | 0.346 $\pm$ 0.074 | 0.788 $\pm$ 0.146 | 1.111 $\pm$ 0.190** | 1.159 $\pm$ 0.139***     |
| C20:0 1-deoxydihydroceramide                               | 0.403 $\pm$ 0.086 | 0.730 $\pm$ 0.095 | 1.057 $\pm$ 0.147** | 1.206 $\pm$ 0.105***, †† |
| C22:0 1-deoxydihydroceramide                               | 1.472 $\pm$ 0.298 | 1.658 $\pm$ 0.216 | 2.070 $\pm$ 0.337   | 2.549 $\pm$ 0.232†       |
| C24:0 1-deoxydihydroceramide                               | 1.475 $\pm$ 0.256 | 1.354 $\pm$ 0.192 | 1.687 $\pm$ 0.245   | 1.961 $\pm$ 0.214        |
| C24:1 1-deoxydihydroceramide                               | 0.758 $\pm$ 0.191 | 1.155 $\pm$ 0.151 | 1.530 $\pm$ 0.249   | 1.942 $\pm$ 0.204**, †   |
| Total 1-deoxydihydroceramides                              | 4.601 $\pm$ 0.894 | 6.071 $\pm$ 0.747 | 7.939 $\pm$ 1.125   | 9.404 $\pm$ 0.812**, †   |

Values are expressed as mean  $\pm$  SD.

\* statistically significant compared to lean (Tukey-Kramer adjusted p value: \*p<0.05, \*\*p<0.01, \*\*\*p<0.001).

† statistically significant compared to obese (Tukey-Kramer adjusted p value: †p<0.05, ††p<0.01, †††p<0.001).

‡ statistically significant compared to obese + T2D (Tukey-Kramer adjusted p value: ‡p<0.05, ‡‡p<0.01, ‡‡‡p<0.001).

§ statistically significant compared to obese + T2D + DN (Tukey-Kramer adjusted p value: §p<0.05, §§p<0.01, §§§p<0.001).
